# Supplementary material for: Comprehensive analysis of the biological function and immune infiltration of SLC38A2 in gastric cancer
Source: Springer Nature journal article supplement (doi:10.1186/s12876-023-02689-4), 2023-03-14
Supplement: MOESM1 [file 24622996]

T4 N4 T5 N5 T6 N6 T1 N1 T2 N2 T3 N3

SLC38A2

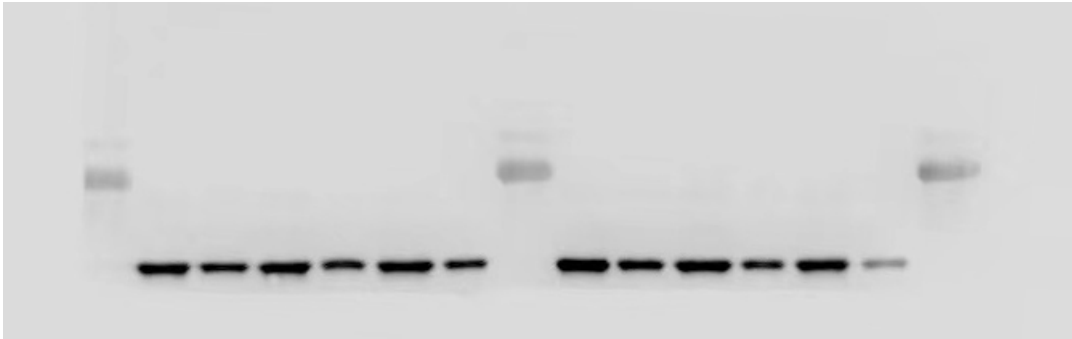

GAPDH

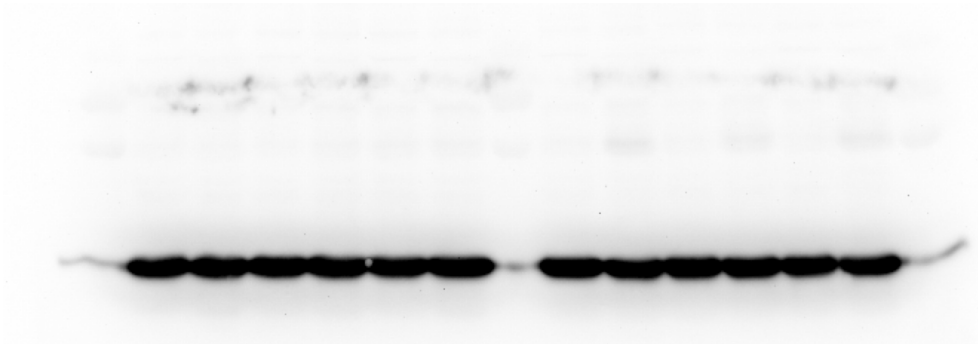

MKN45 AGS MKN1 HGC27 GES-1

SLC38A2 →

GAPDH →

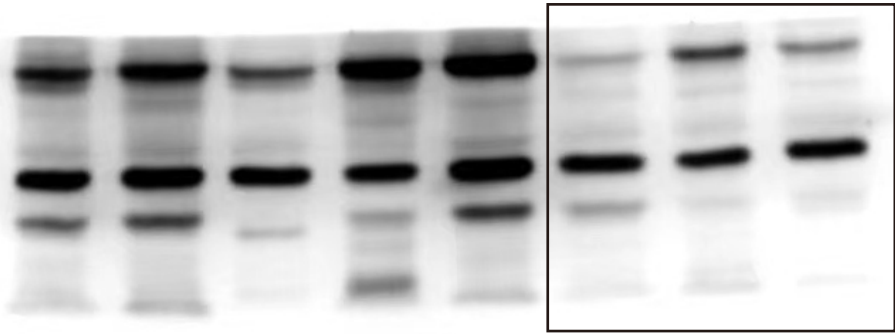

Irrelevant Samples
