# Supplementary material for: Comprehensive analysis of the biological function and immune infiltration of SLC38A2 in gastric cancer
Source: Springer Nature journal article supplement (doi:10.1186/s12876-023-02689-4), 2023-03-14
Supplement: MOESM5 [file 24622996]

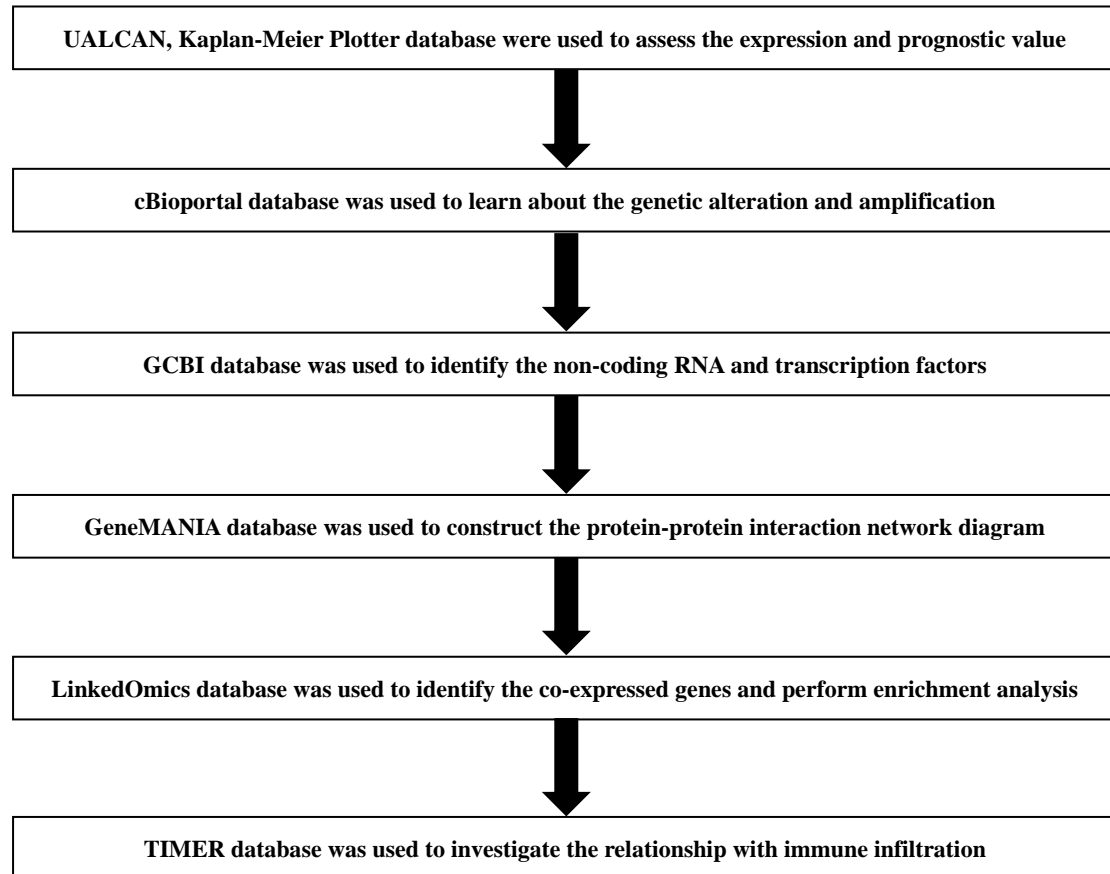

Fig. S2 Steps of bioinformatics analysis of SLC38A2.
